# Supplementary material for: To treat wastewater with wastes: a highly efficient flocculant from fly ash and rice straw
Source: Royal Society of Chemistry journal article supplement (doi:10.1039/d4ra05550k), 2024-01-01
Supplement: d4ra05550k1.pdf [file d4ra05550k1.pdf]

# 1 To treat wastewater with wastes: a highly 2 efficient flocculant from fly ash and rice 3 straw

4 Shuichang Chen<sup>1,2</sup>, Wanghua Wu<sup>1,2</sup>, Haodong Ye<sup>3</sup>, Haiqing Liu<sup>1</sup>, Qinghua Chen<sup>1</sup>, Shiqian Li<sup>2\*</sup>

5 <sup>1</sup> College of Chemistry and Materials Science, Fujian Normal University, Fuzhou 350117, China;

6 <sup>2</sup> College of Materials and Package Engineering, Fujian Provincial Key Lab of Coastal Basin Environment,  
7 Fujian Polytechnic Normal University, Fuqing 350300, China;

8 <sup>3</sup> College of Agriculture, Guangxi University, Guangxi 530004, China.

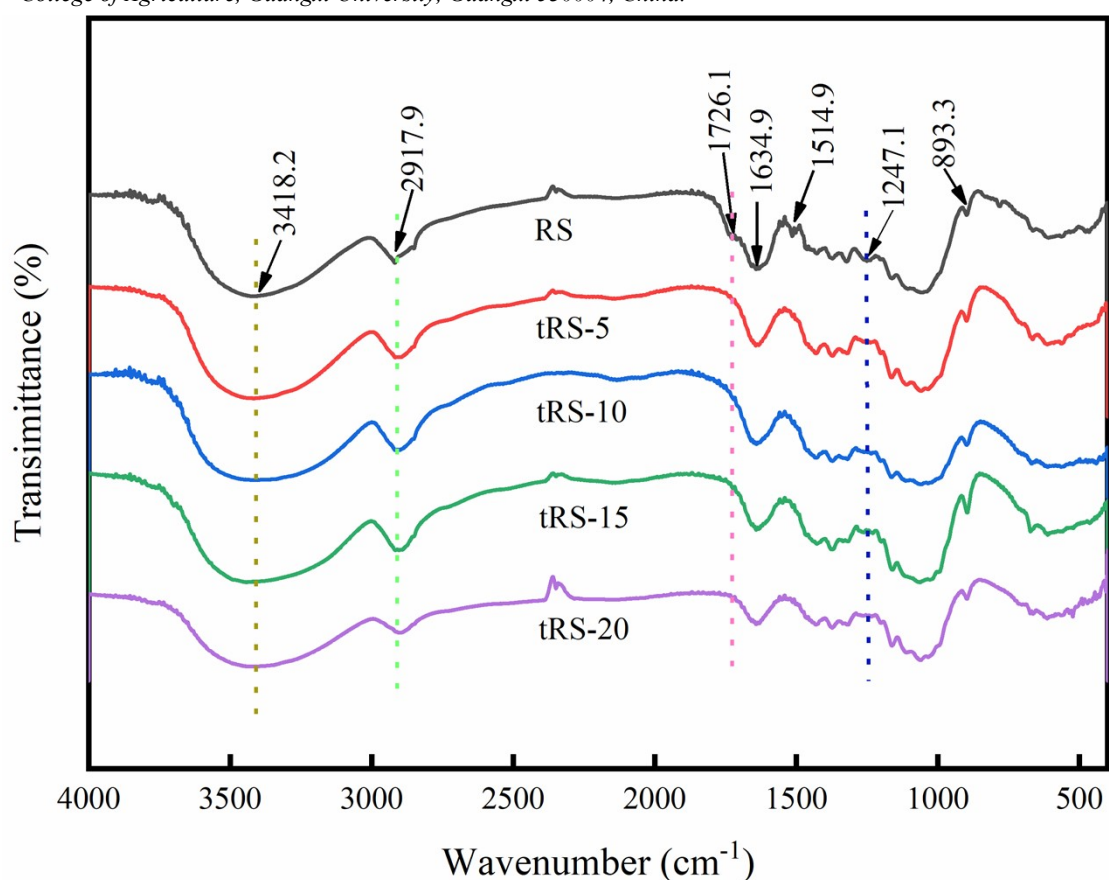

9  
10 Fig. S1. FTIR plots of straw treated with different concentrations of alkali  
11

\* Corresponding author: Shiqian Li: Prof. E-mail: lishiqian@whu.edu.cn

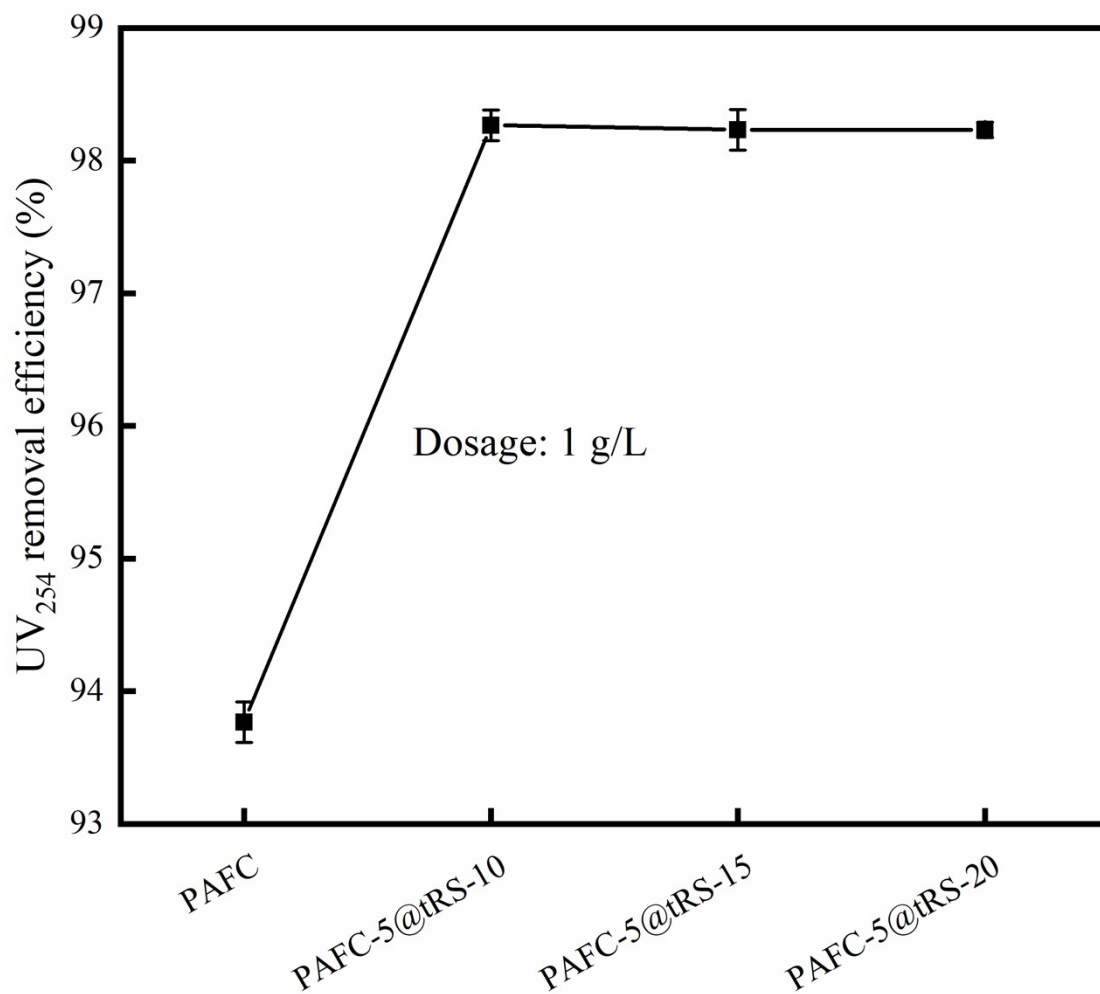

12

13 Fig. S2. UV<sub>254</sub> removal efficiency of PAFC/RS prepared using straw with different levels of alkali  
14 treatment

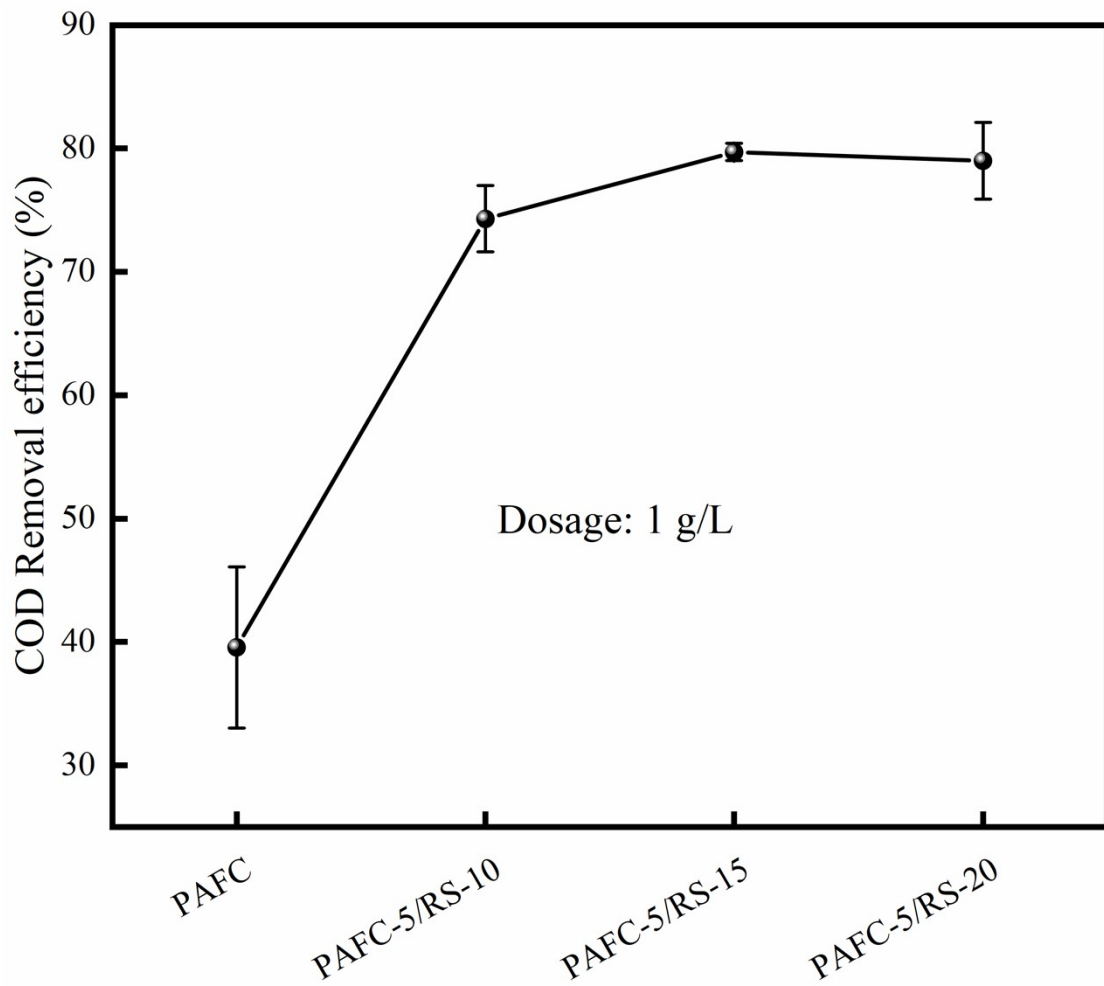

15

16 Fig. S3. COD removal efficiency of PAFC/RS prepared using straw with different levels of alkali

17 treatment

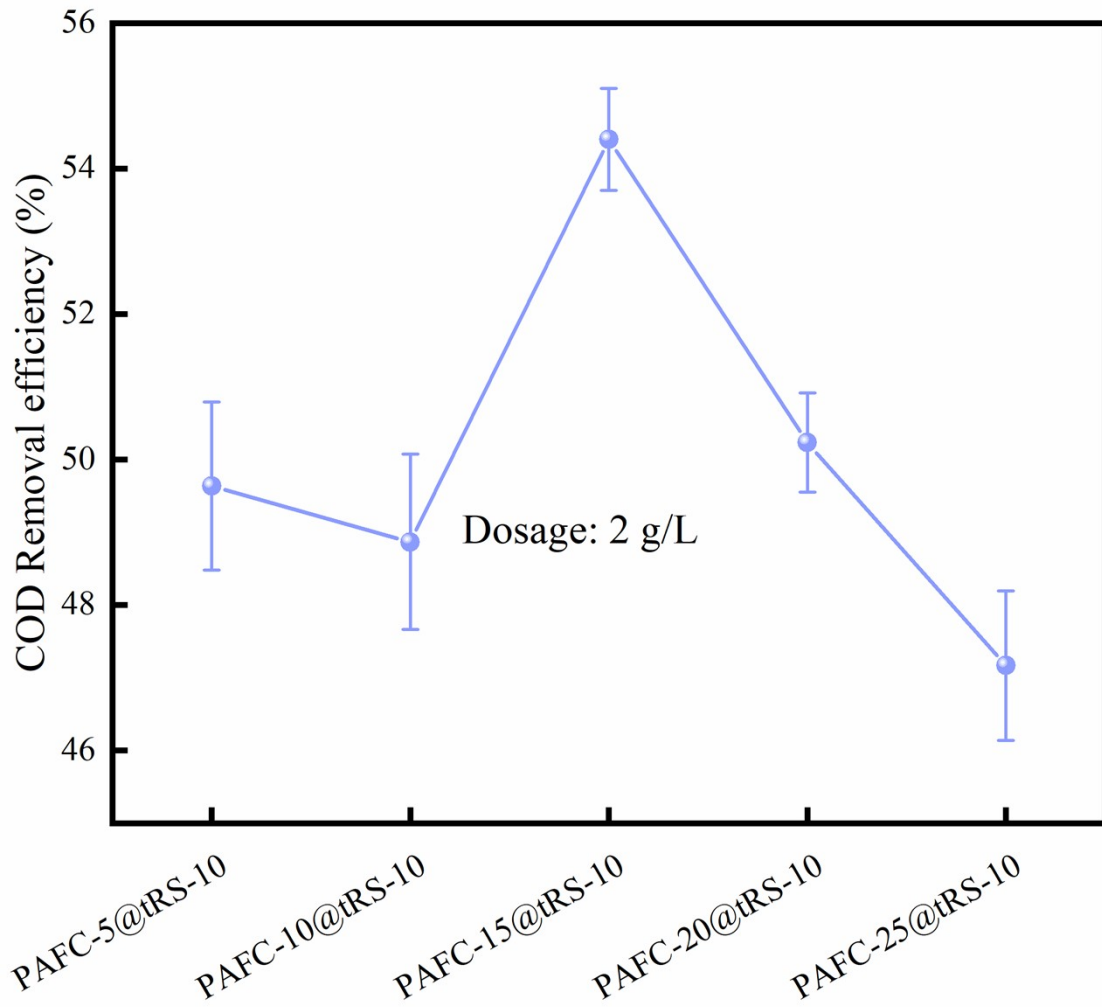

18

19 Fig. S4. COD removal efficiency of PAFC/RS-10 with different PAFC loadings

20
